# Supplementary material for: Remote ischemic preconditioning STAT3-dependently ameliorates pulmonary ischemia/reperfusion injury
Source: PubMed Central journal article supplement (PMC5955491; doi:10.1371/journal.pone.0196186), 2018-05-16

Western blot data:

Figure 5A

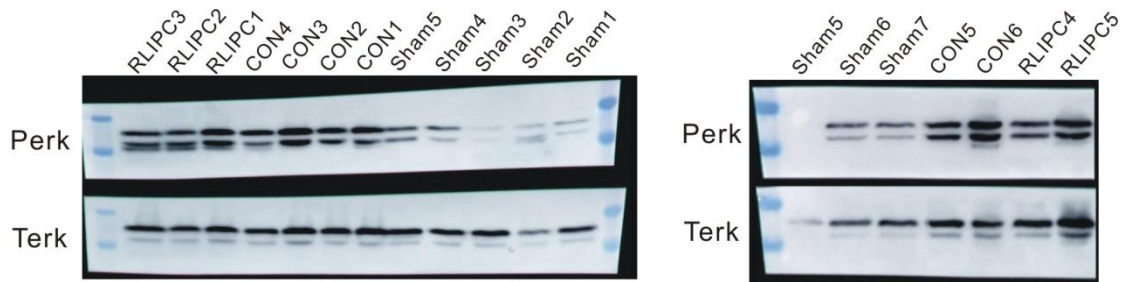

Figure 5B

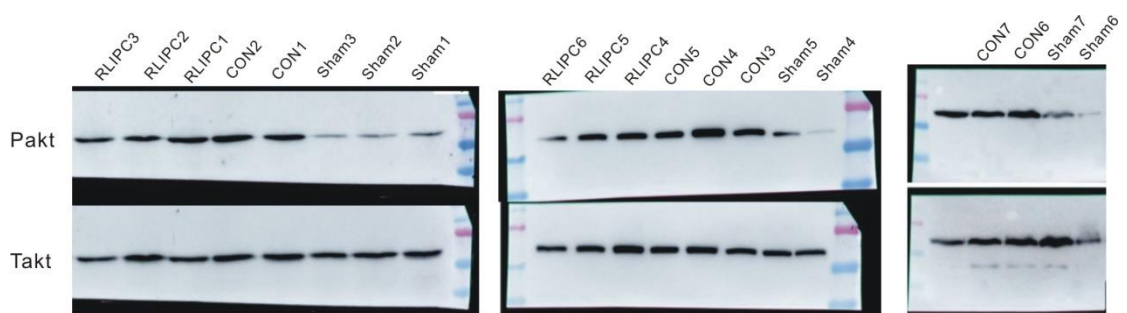

Figure 5C

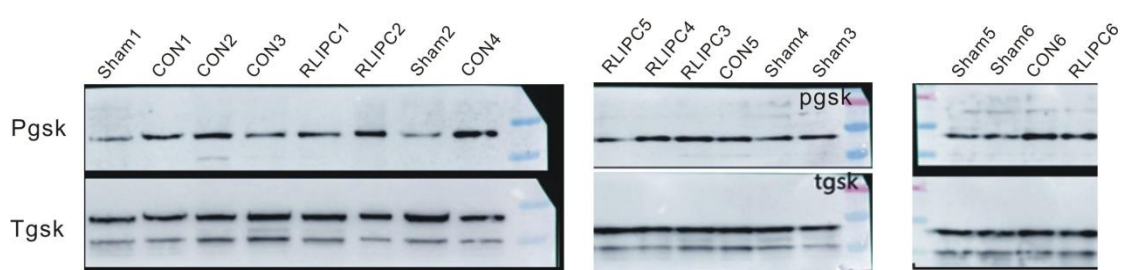

Figure 5D

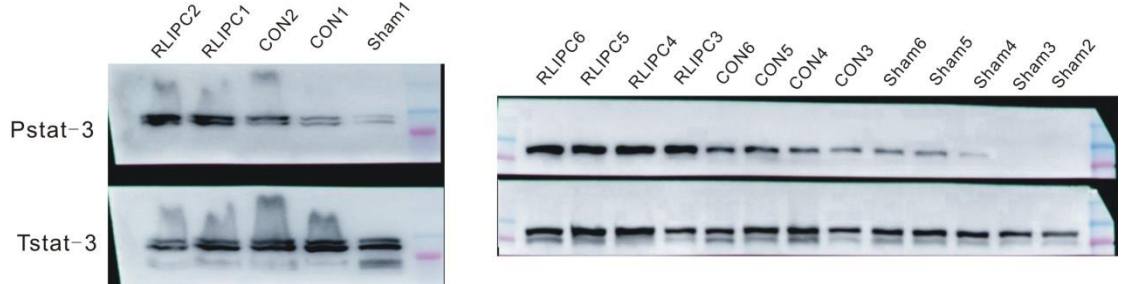

Figure 5E

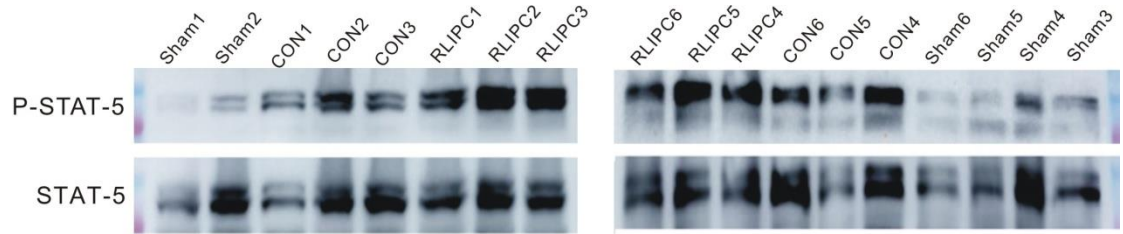

Figure 4B

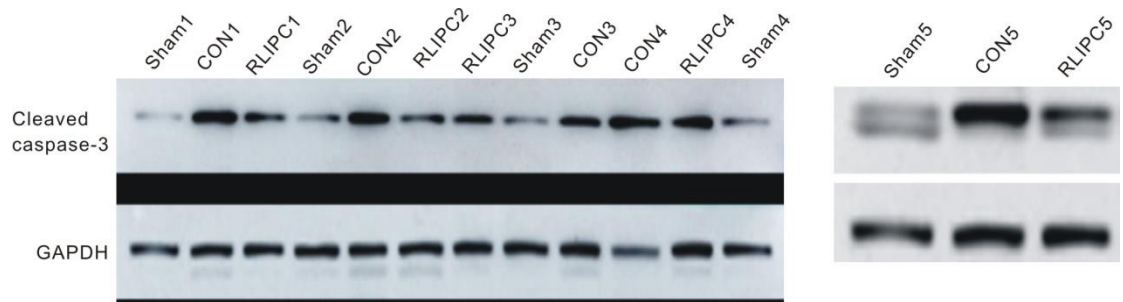

Figure 6E

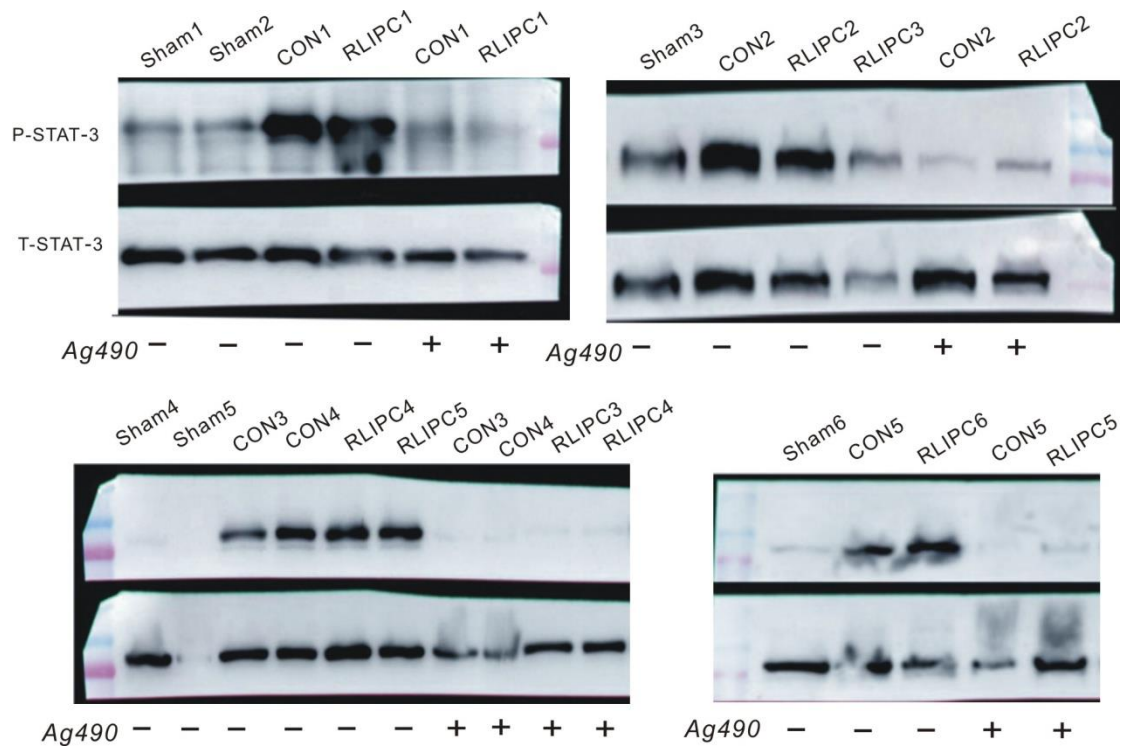

Histology data:

Figure 2A

10x sham

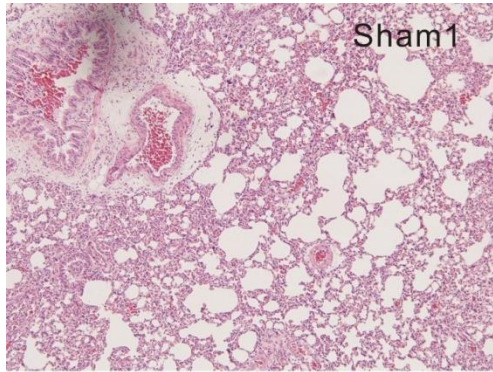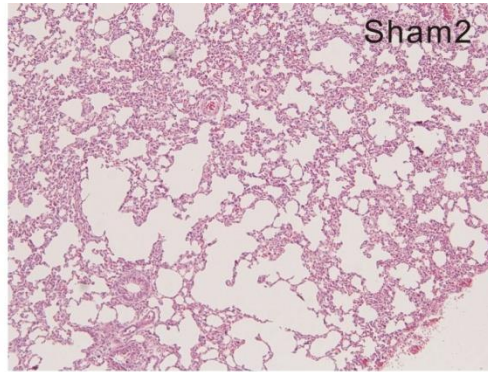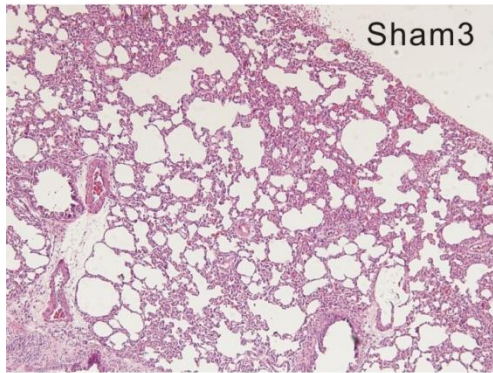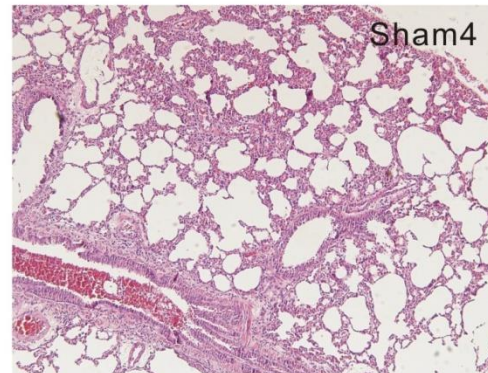

40x sham

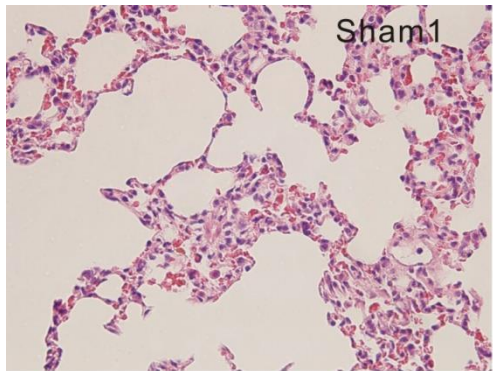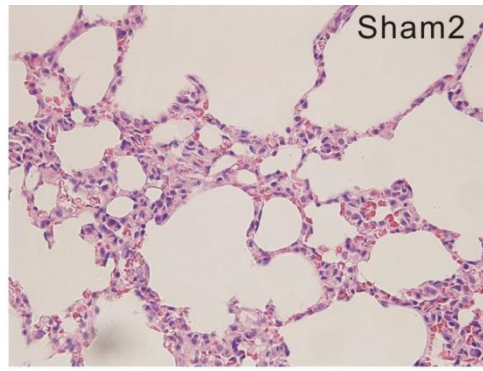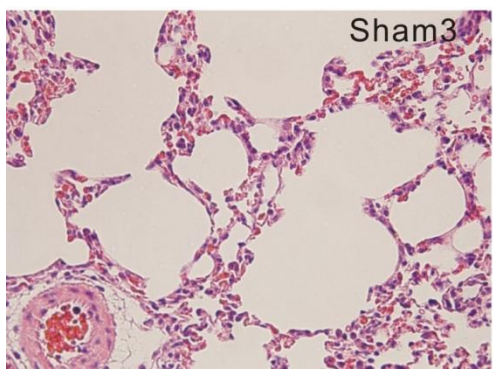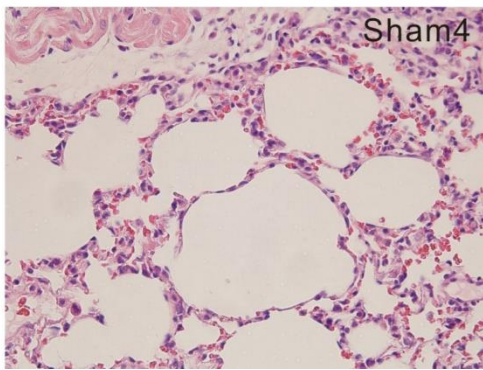

10x CON

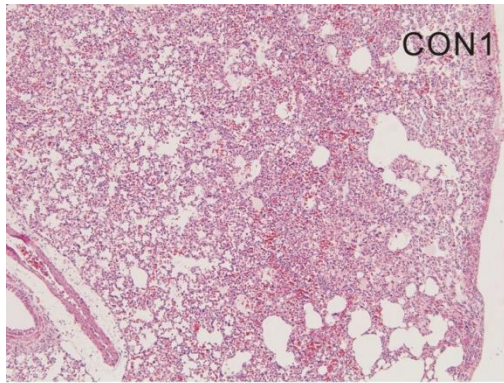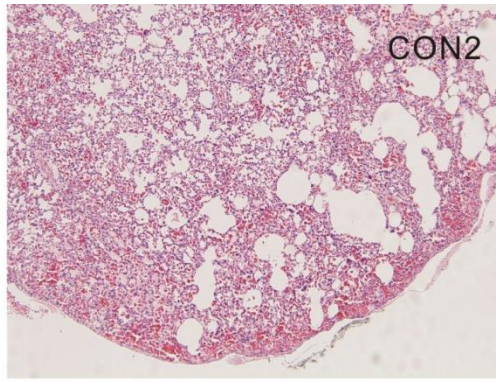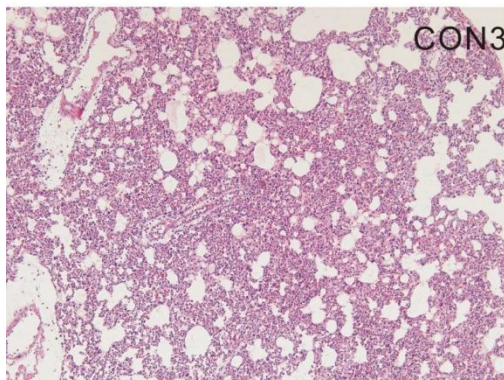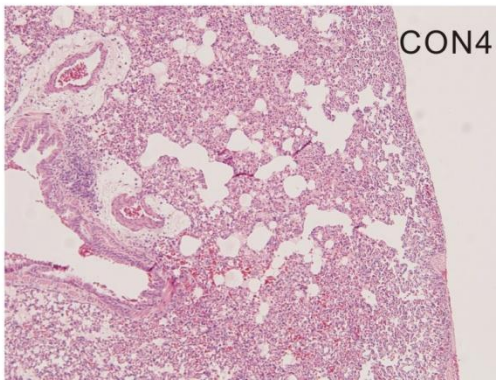

40x CON

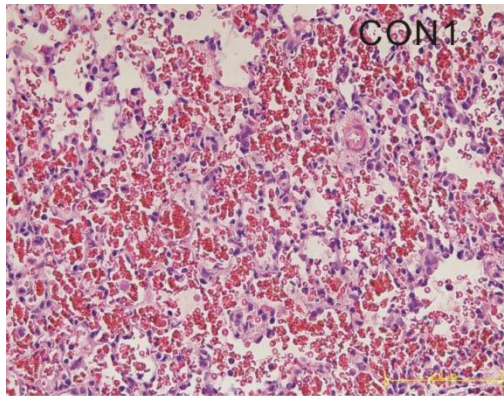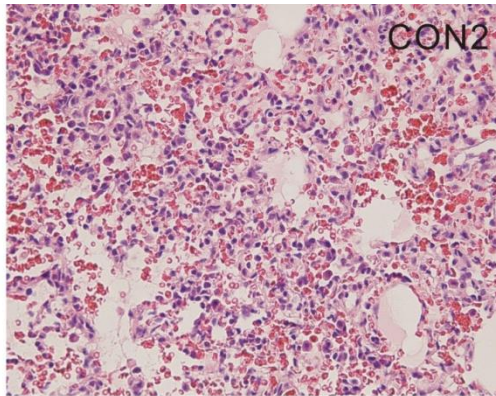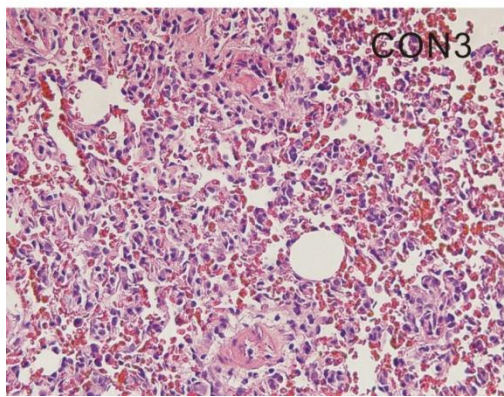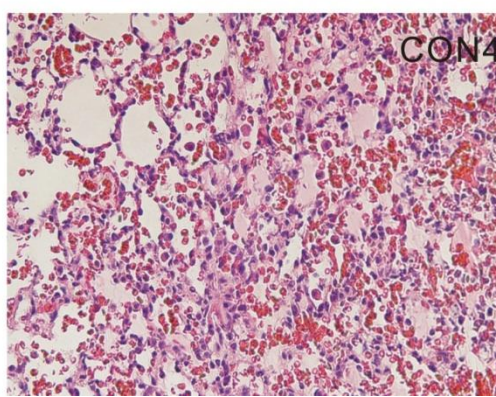

10x RLIPC

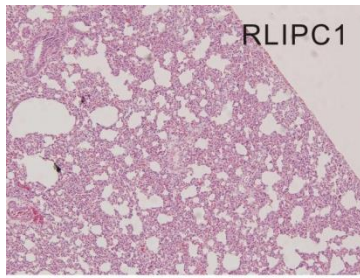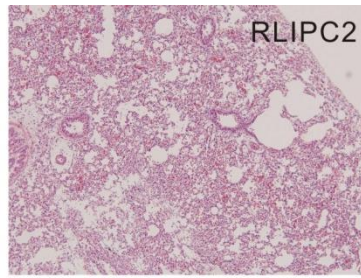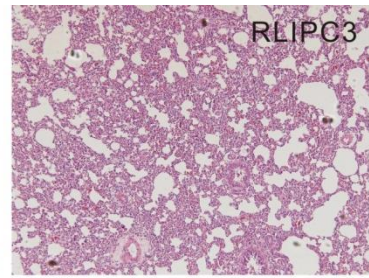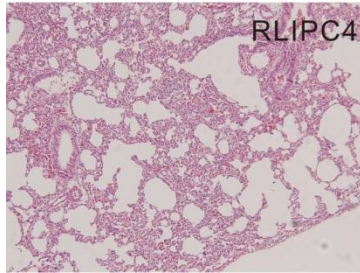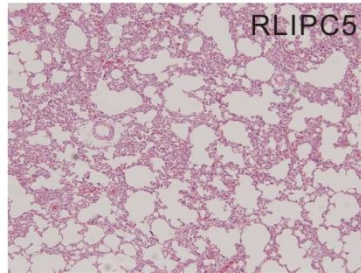

40x RLIPC

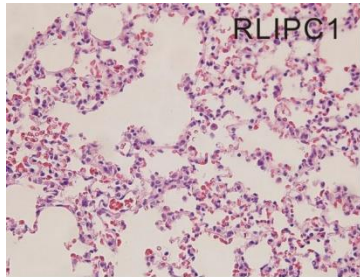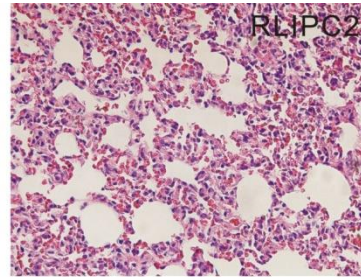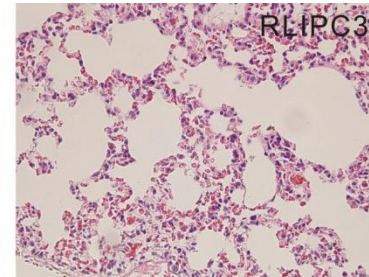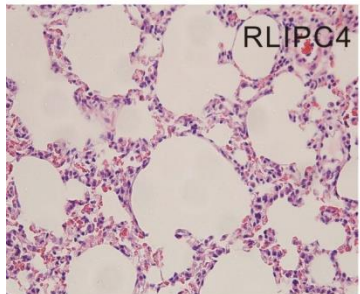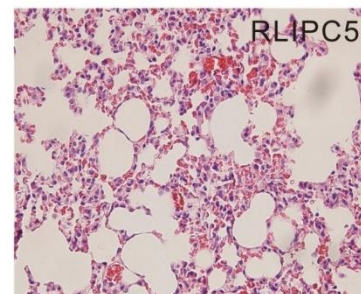

Figure 6D

40x AG490 CON

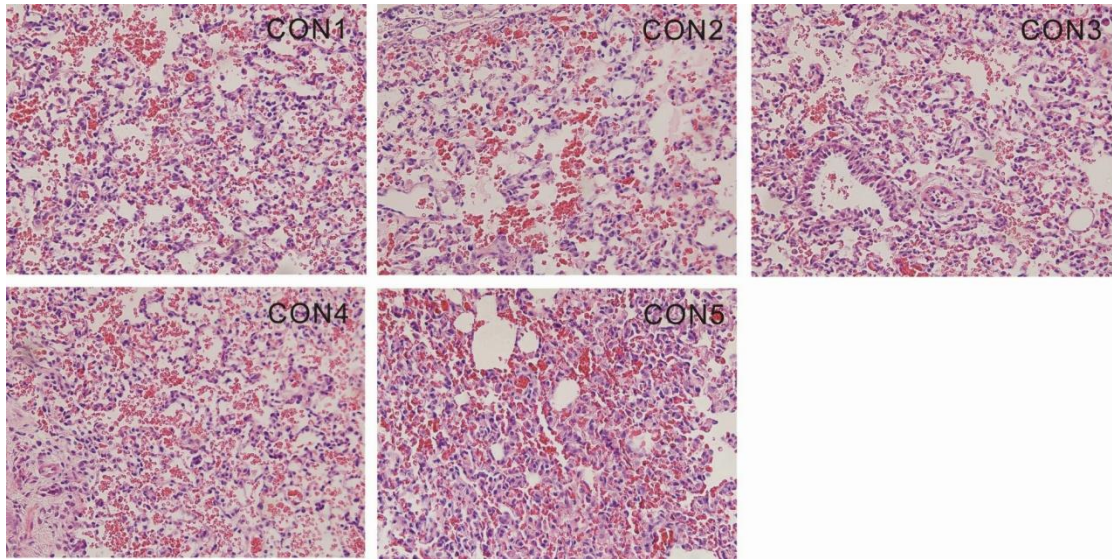

40x AG490 RLIPC

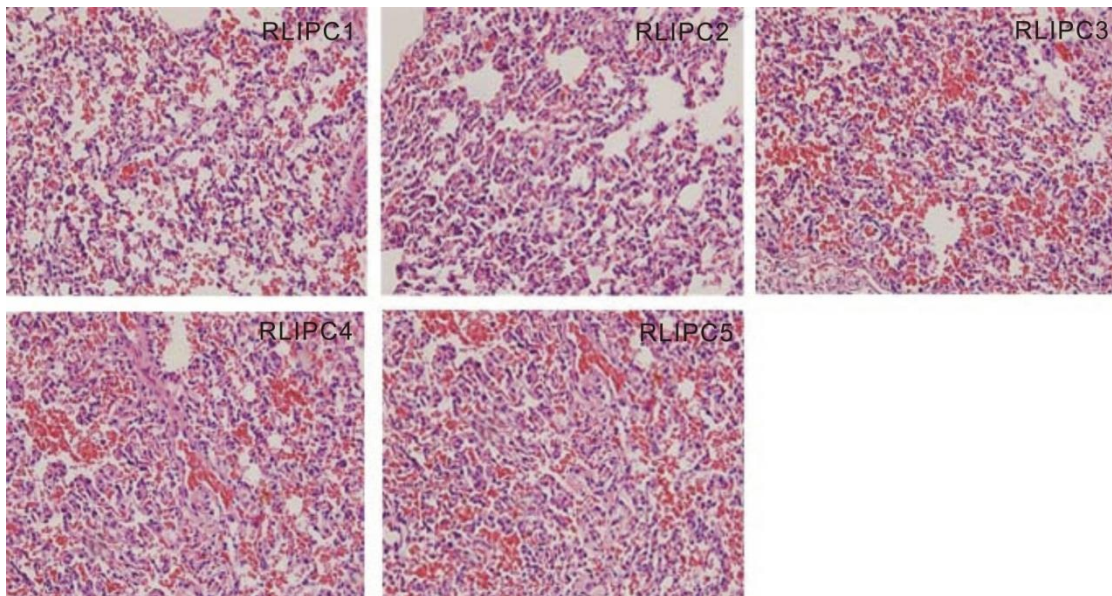

Figure 4A

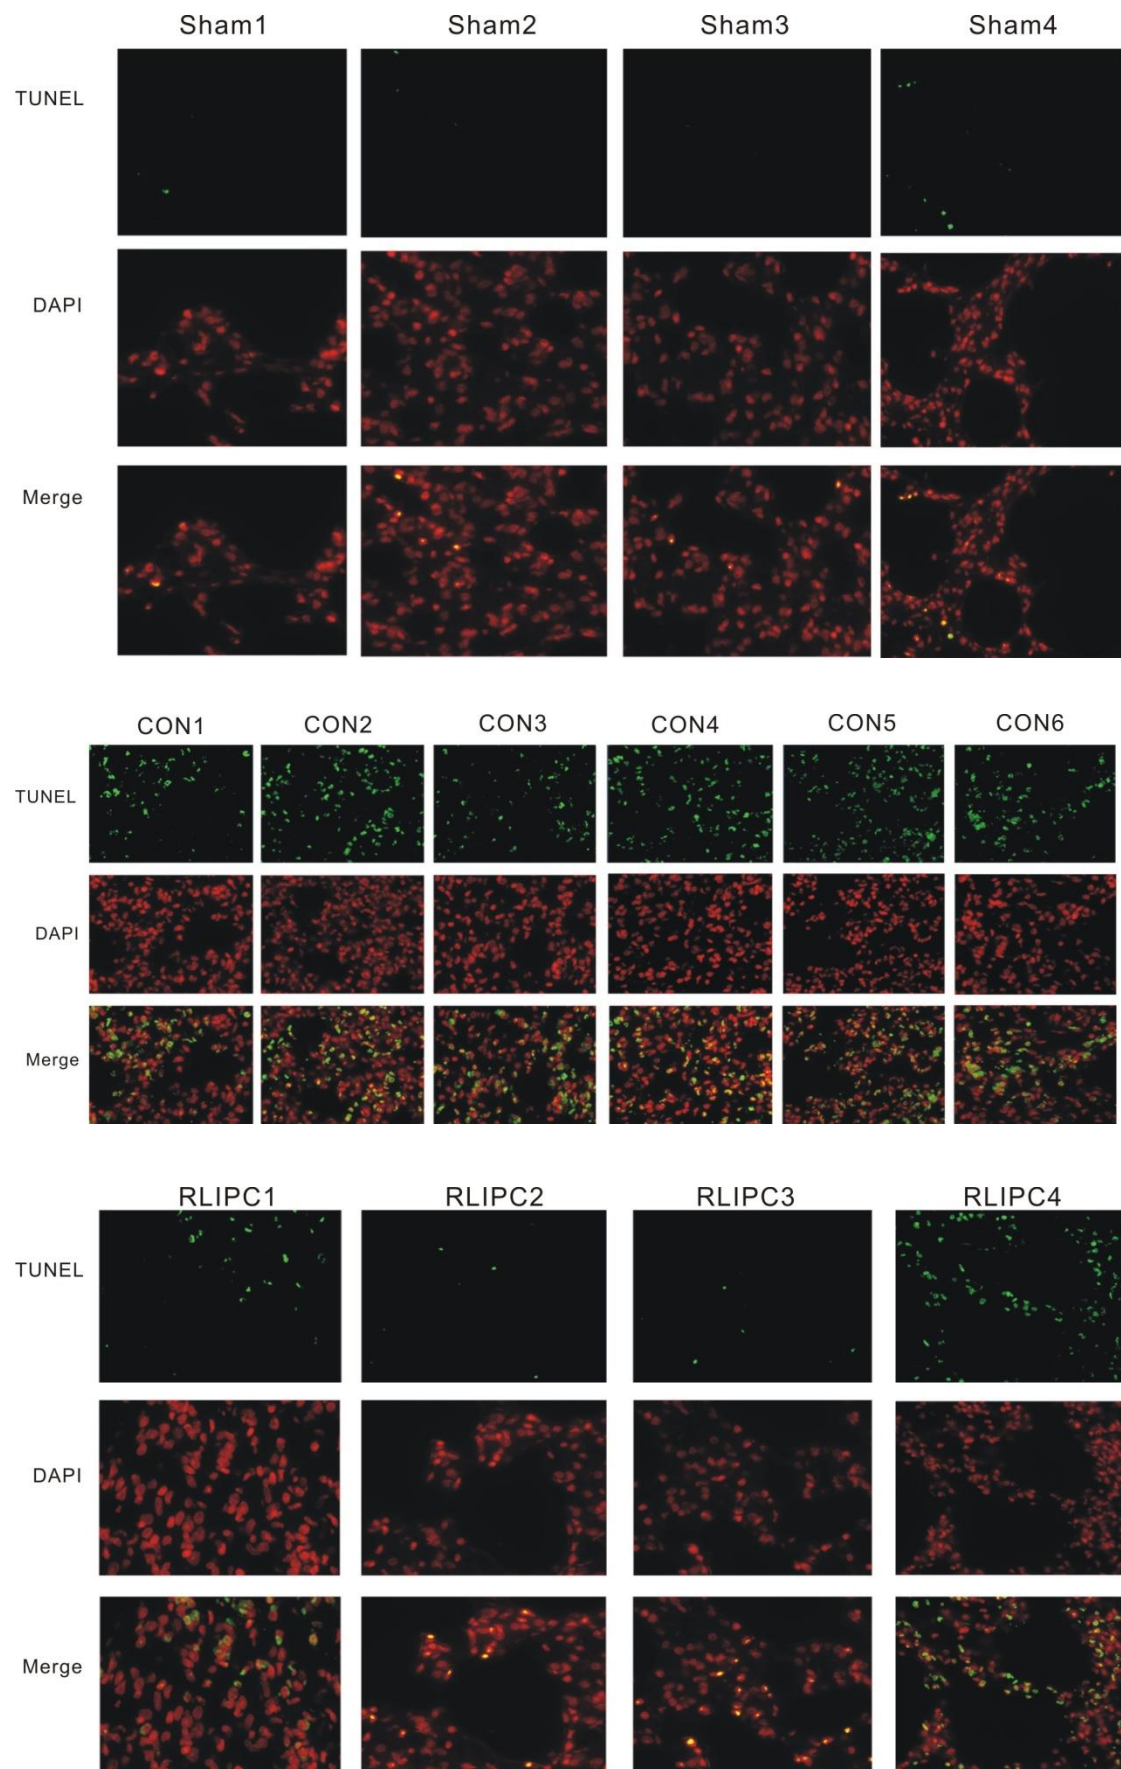

Supplement: pone.0196186.s001.pdf [file pone.0196186.s001.pdf]
